# Supplementary material for: Oxidative Phosphorylation System in Gastric Carcinomas and Gastritis
Source: Oxid Med Cell Longev. 2017 Jun 28;2017:1320241. doi: 10.1155/2017/1320241 (PMC5506471; doi:10.1155/2017/1320241)
Supplement: Supplementary file 3 [file 1320241.f3.xls]

## Sheet: Tabelle1
Supplementary table 1: Primers used for amplification and sequencing of mtDNA
	position	forward primer sequence	reverse primer sequence	length
mtDNA	3079-3505	TAGATGTGGCGGGTTTTAGG	GGAGTAATCCAGGTCGGTT	426
mtDNA	3439-3894	GCTACTACAACCCTTCGCTGAC	GTTCGGTTGGTCTCTGCTAGTG	456
mtDNA	3734-4235	CTGCGAGCAGTAGCCCAAAC	TGCTAGGGTGAGTGGTAGGAAG	501
mtDNA	4183-4552	TTCCTACCACTCACCCTAGCA	AAAAATCAGTGCGAGCTTAGC	369
mtDNA	4506-5004	CATCTTTGCAGGCACACTCATC	GATTTTGCGTAGCTGGGTTTGG	499
mtDNA	4956-5484	CATAGCAGGCAGTTGAGGTGG	AGGTAGGAGTAGCGTGGTAAGG	529
mtDNA	5429-5929	CAAAACCCACCCCATTCCTCC	AATAGTCAACGGTCGGCGAAC	500
mtDNA	5861-6345	ACAGTCCAATGCTTCACTCAGC	AGATGGTTAGGTCTACGGAGGC	485
mtDNA	6955-7492	GGTGGCCTGACTGGCATTG	GTTGGCTTGAAACCAGCTTTGG	537
mtDNA	7401-7682	ACCCTACCACACATTCG	GGAAAATGATTATGAGGGCG	281
mtDNA	8012-8561	AGTACTCCCGATTGAAGCCCC	GGGCAATGAATGAAGCGAACAG	550
mtDNA	9742-9989	CAGAGTACTTCGAGTCTCCCTTC	GACCCTCATCAATAGATGGAGAC	248
mtDNA	9916-10367	AGCCGCCGCCTGATACTG	CCAGACTTAGGGCTAGGATGATG	451
mtDNA	10132-10367	ACCACAACTCAACGGCTACATAG	CCAGACTTAGGGCTAGGATGATG	236
mtDNA	10279-10634	CCCTACCATGAGCCCTACAAAC	TAAGAGGGAGTGGGTGTTGAGG	356
mtDNA	10535-10926	AGTCTAGGCCATATGTGTTGGAG	AGGTTGGGGAACAGCTAAATAGG	391
mtDNA	10690-10925	GCCTAGCCCTACTAGTCTCAATC	AGGTTGGGGAACAGCTAAATAGG	236
mtDNA	10832-11315	ATCAACACAACCACCCACAGC	GTTCTTGGGCAGTGAGAGTGAG	484
mtDNA	11188-11720	TGAACGCAGGCACATACTTCC	TCCGTGGGCGATTATGAGAATG	533
mtDNA	11654-12195	ACAGCCATTCTCATCCAAACCC	GGTCGTAAGCCTCTGTTGTCAG	542
mtDNA	12009-12462	GCTCACTCACCCACCACAT	GCTCACTCACCCACCACAT	454
mtDNA	12358-12848	ACCACCCTAACCCTGACTTCC	GCTTGAATGGCTGCTGTGTTG	491
mtDNA	12806-13311	GATGATACGCCCGAGCAGATG	TGCTAGGTGTGGTTGGTTGATG	506
mtDNA	13250-13786	TCCACTTCAAGTCAACTAGGAC	GGGGATTGTTGTTTGGAAGGG	537
mtDNA	13708-14070	GCAGCCGGAAGCCTATTCG	TGAGGTGATGATGGAGGTGGAG	363
mtDNA	13931-14373	ATCACACACCGCACAATCCC	ATTGGTGCTGTGGGTGAAAGAG	442
mtDNA	14262-14707	TCCTCCCGAATCAACCCTGAC	TCATTGGTCGTGGTTGTAGTCC	446
mtDNA	14548-14992	AATAACACACCCGACCACAC	AAGGTAGCGGATGATTCAGC	445
mtDNA	15588-16187	CTCCGATCCGTCCCTAACAAAC	GGTTTTGATGTGGATTGGGT	598
Position: Position of the PCR fragments. Length: Length of the PCR products.The following reference sequence have been used for position: mtDNA (J01415)
