# Supplementary material for: Oxidative Phosphorylation System in Gastric Carcinomas and Gastritis
Source: Oxid Med Cell Longev. 2017 Jun 28;2017:1320241. doi: 10.1155/2017/1320241 (PMC5506471; doi:10.1155/2017/1320241)
Supplement: Supplementary file 6 [file 1320241.f6.xls]

## Sheet: Porin
Supplementary table 4 - Part A Score values for porin in intestinal gastric carcinoma
	Tumor			Normal			HP-history
Case	Percentage	Intensity	Score	Percentage	Intensity	Score
1	85	2.5	212.5	85	2.5	212.5
2	90	2.5	225	85	2	170
3	90	2.5	225	75	2.5	187.5	HP
4	75	2	150	85	2.5	212.5	HP
5	85	3	255	85	2.5	212.5
6	85	1.5	127.5	85	2.5	212.5	HP
7	85	2.5	212.5	85	2	170
8	85	2.5	212.5	85	2	170
9	85	2.5	212.5	85	2	170	HP
10	75	1.5	112.5	75	1	75	HP
11	85	2	170	75	2	150	HP
12	75	1.5	112.5			0	HP
13	85	2.5	212.5			0
14			0			0	HP
15	85	2.5	212.5	75	1.5	112.5	HP
16	90	2.5	225	85	2	170	HP
17	85	2.5	212.5	75	2	150
18	85	2.5	212.5	85	2	170
19	85	2.5	212.5	75	1.5	112.5
20	85	3	255	85	2.5	212.5

## Sheet: Complex I
Supplementary table 4 - Part B Score values for complex I in intestinal gastric carcinoma
	Tumor			Normal			HP-history
Case	Percentage	Intensity	Score	Percentage	Intensity	Score
1	85	2.5	212.5	75	1.5	112.5
2	65	1.5	97.5	85	2.5	212.5
3	45	1.5	67.5	75	2	150	HP
4	65	2	130	90	3	270	HP
5	35	1	35	85	2.5	212.5
6	65	2	130	85	2.5	212.5	HP
7	55	1.5	82.5	85	1.5	127.5
8	65	1.5	97.5	85	2	170
9	65	1.5	97.5	75	2.5	187.5	HP
10	55	1.5	82.5	65	1.5	97.5	HP
11	75	2.5	187.5	75	2.5	187.5	HP
12	65	2.5	162.5			0	HP
13	85	1.5	127.5			0
14	35	1	35	75	2	150	HP
15	55	1.5	82.5	75	2.5	187.5	HP
16	75	2	150	75	2	150	HP
17	65	2.5	162.5	85	2.5	212.5
18	65	2	130	85	2.5	212.5
19	85	2.5	212.5	85	2	170
20	65	1.5	97.5	85	2.5	212.5
In cases highlighted in yellow complex I negative areas were detected.

## Sheet: Complex II
Supplementary table 4 - Part C Score values for complex II in intestinal gastric carcinoma
	Tumor			Normal			HP-history
Case	Percentage	Intensity	Score	Percentage	Intensity	Score
1	75	2.5	187.5	65	1	65
2	35	1	35	55	1.5	82.5
3	55	1.5	82.5	65	1.5	97.5	HP
4	55	1	55	75	1.5	112.5	HP
5	45	1.5	67.5	75	1	75
6	55	1	55	65	1	65	HP
7	45	1	45	65	1	65
8	45	1	45	75	1.5	112.5
9	65	1.5	97.5	75	1.5	112.5	HP
10	35	1.5	52.5	75	1	75	HP
11	75	2	150	65	1.5	97.5	HP
12	55	1.5	82.5			0	HP
13	55	1.5	82.5			0
14	35	1	35	75	2	150	HP
15	65	1.5	97.5	75	1.5	112.5	HP
16	35	1	35	55	1	55	HP
17	65	1.5	97.5	75	1	75
18	35	1.5	52.5	75	1.5	112.5
19	75	2.5	187.5	65	1.5	97.5
20	55	1.5	82.5	75	2	150

## Sheet: Complex III
Supplementary table 4 - Part D Score values for complex III in intestinal gastric carcinoma
	Tumor			Normal			HP-history
Case	Percentage	Intensity	Score	Percentage	Intensity	Score
1	75	2.5	187.5	75	1.5	112.5
2	85	2.5	212.5	75	2.5	187.5
3	65	1.5	97.5	75	2	150	HP
4	55	1.5	82.5	75	2	150	HP
5	75	2.5	187.5	65	1.5	97.5
6	65	1.5	97.5	75	2	150	HP
7	75	2.5	187.5	85	2.5	212.5
8	65	2.5	162.5	75	1.5	112.5
9	75	2.5	187.5	75	2.5	187.5	HP
10	65	1.5	97.5	65	1.5	97.5	HP
11	65	2.5	162.5	75	2.5	187.5	HP
12	65	2	130			0	HP
13	65	2.5	162.5			0
14	55	1.5	82.5	65	2.5	162.5	HP
15	65	2.5	162.5	65	2.5	162.5	HP
16	85	2	170	75	2	150	HP
17	75	2	150	65	1.5	97.5
18	45	2.5	112.5	75	2	150
19	75	2.5	187.5	75	2	150
20	65	2.5	162.5	75	3	225

## Sheet: Complex IV
Supplementary table 4 - Part E Score values for complex IV in intestinal gastric carcinoma
	Tumor			Normal			HP-history
Case	Percentage	Intensity	Score	Percentage	Intensity	Score
1	75	2.5	187.5	75	2	150
2	65	1.5	97.5	65	1.5	97.5
3	65	1.5	97.5	85	2	170	HP
4	75	2	150	85	2.5	212.5	HP
5	55	2	110	65	2	130
6	55	1.5	82.5	65	1.5	97.5	HP
7	85	2.5	212.5	90	2.5	225
8	90	2.5	225	85	2	170
9	65	1.5	97.5	85	2.5	212.5	HP
10	65	2.5	162.5	65	1.5	97.5	HP
11	75	2.5	187.5	75	2.5	187.5	HP
12	85	2.5	212.5			0	HP
13	75	2.5	187.5			0
14	55	1.5	82.5	65	2	130	HP
15	85	2.5	212.5	75	2.5	187.5	HP
16	75	2	150	85	2.5	212.5	HP
17	75	2	150	85	2.5	212.5
18	85	3	255	75	2.5	187.5
19	90	3	270	75	2.5	187.5
20	85	3	255	85	3	255
In cases highlighted in yellow complex IV negative areas were detected.

## Sheet: Complex V
Supplementary table 4 - Part F Score values for complex V in intestinal gastric carcinoma
	Tumor			Normal			HP-history
Case	Percentage	Intensity	Score	Percentage	Intensity	Score
1	85	3	255	75	2.5	187.5
2	85	2.5	212.5	75	2	150
3	85	3	255	85	2.5	212.5	HP
4	75	1.5	112.5	90	3	270	HP
5	85	3	255	75	1.5	112.5
6	85	2.5	212.5	65	2	130	HP
7	75	2.5	187.5	85	2.5	212.5
8	55	2	110	75	1.5	112.5
9	85	2.5	212.5	85	3	255	HP
10	35	1.5	52.5	35	1.5	52.5	HP
11	75	2.5	187.5	75	2	150	HP
12	75	2.5	187.5			0	HP
13	85	1.5	127.5			0
14	65	2.5	162.5	75	2.5	187.5	HP
15	85	3	255	75	3	225	HP
16	85	2.5	212.5	75	2.5	187.5	HP
17	85	2.5	212.5	75	2	150
18	75	3	225	75	2.5	187.5
19	85	3	255	75	2	150
20	85	2.5	212.5	75	2.5	187.5
